# Supplementary material for: Analysis of Electric Moped Scooter Sharing in Berlin: A Technical, Economic and Environmental Perspective
Source: MDPI journal article supplement (doi:10.3390/wevj12030096), 2021-07-02
Supplement: s1 [file s1]

## Supplementary Materials

**Table S1** LCIA for e-moped fleets with German electricity mix of 2019

| Impact category                                      | Unit         | Active fleet: 2,500 vehicles |              |                   | 10,000 vehicles |              |                   | 50,000 vehicles |              |                   |
|------------------------------------------------------|--------------|------------------------------|--------------|-------------------|-----------------|--------------|-------------------|-----------------|--------------|-------------------|
|                                                      |              | Value                        | Value per km | Value per vehicle | Value           | Value per km | Value per vehicle | Value           | Value per km | Value per vehicle |
| Ozone formation, Terrestrial ecosystems - production | kg NOx eq    | 1.03E+04                     | 3.39E-05     | 3.05E+00          | 4.11E+04        | 3.59E-05     | 3.05E+00          | 2.05E+05        | 4.93E-05     | 3.05E+00          |
| Ozone formation, Human health - production           | kg NOx eq    | 9.75E+03                     | 3.22E-05     | 2.89E+00          | 3.90E+04        | 3.41E-05     | 2.89E+00          | 1.95E+05        | 4.68E-05     | 2.89E+00          |
| Fine particulate matter formation - production       | kg PM2.5 eq  | 1.27E+04                     | 4.20E-05     | 3.77E+00          | 5.08E+04        | 4.45E-05     | 3.77E+00          | 2.54E+05        | 6.10E-05     | 3.77E+00          |
| Fossil resource scarcity - production                | kg oil eq    | 7.85E+05                     | 2.59E-03     | 2.33E+02          | 3.14E+06        | 2.75E-03     | 2.33E+02          | 1.57E+07        | 3.77E-03     | 2.33E+02          |
| Land use - production                                | m2a crop eq  | 6.10E+04                     | 2.02E-04     | 1.81E+01          | 2.44E+05        | 2.14E-04     | 1.81E+01          | 1.22E+06        | 2.93E-04     | 1.81E+01          |
| Human carcinogenic toxicity - production             | kg 1,4-DCB   | 5.32E+05                     | 1.76E-03     | 1.58E+02          | 2.13E+06        | 1.86E-03     | 1.58E+02          | 1.06E+07        | 2.55E-03     | 1.58E+02          |
| Stratospheric ozone depletion - production           | kg CFC11 eq  | 1.50E+00                     | 4.96E-09     | 4.46E-04          | 6.01E+00        | 5.26E-09     | 4.46E-04          | 3.00E+01        | 7.21E-09     | 4.46E-04          |
| Water consumption - production                       | m3           | 3.15E+04                     | 1.04E-04     | 9.35E+00          | 1.26E+05        | 1.10E-04     | 9.35E+00          | 6.30E+05        | 1.51E-04     | 9.35E+00          |
| Marine eutrophication - production                   | kg N eq      | 1.34E+02                     | 4.42E-07     | 3.97E-02          | 5.35E+02        | 4.68E-07     | 3.97E-02          | 2.67E+03        | 6.42E-07     | 3.97E-02          |
| Freshwater eutrophication - production               | kg P eq      | 3.09E+03                     | 1.02E-05     | 9.18E-01          | 1.24E+04        | 1.08E-05     | 9.18E-01          | 6.19E+04        | 1.49E-05     | 9.18E-01          |
| Freshwater ecotoxicity - production                  | kg 1,4-DCB   | 1.94E+06                     | 6.40E-03     | 5.75E+02          | 7.74E+06        | 6.78E-03     | 5.75E+02          | 3.87E+07        | 9.30E-03     | 5.75E+02          |
| Human non-carcinogenic toxicity - production         | kg 1,4-DCB   | 2.00E+07                     | 6.62E-02     | 5.94E+03          | 8.01E+07        | 7.01E-02     | 5.94E+03          | 4.00E+08        | 9.61E-02     | 5.94E+03          |
| Ionizing radiation - production                      | kBq Co-60 eq | 1.54E+05                     | 5.09E-04     | 4.57E+01          | 6.16E+05        | 5.39E-04     | 4.57E+01          | 3.08E+06        | 7.39E-04     | 4.57E+01          |
| Marine ecotoxicity - production                      | kg 1,4-DCB   | 2.47E+06                     | 8.16E-03     | 7.33E+02          | 9.88E+06        | 8.65E-03     | 7.33E+02          | 4.94E+07        | 1.19E-02     | 7.33E+02          |
| Global warming - production                          | kg CO2 eq    | 2.79E+06                     | 9.22E-03     | 8.28E+02          | 1.12E+07        | 9.77E-03     | 8.28E+02          | 5.58E+07        | 1.34E-02     | 8.28E+02          |
| Terrestrial ecotoxicity - production                 | kg 1,4-DCB   | 8.29E+07                     | 2.74E-01     | 2.46E+04          | 3.31E+08        | 2.90E-01     | 2.46E+04          | 1.66E+09        | 3.98E-01     | 2.46E+04          |
| Mineral resource scarcity - production               | kg Cu eq     | 2.01E+05                     | 6.64E-04     | 5.96E+01          | 8.04E+05        | 7.04E-04     | 5.96E+01          | 4.02E+06        | 9.65E-04     | 5.96E+01          |
| Terrestrial acidification - production               | kg SO2 eq    | 3.37E+04                     | 1.11E-04     | 9.99E+00          | 1.35E+05        | 1.18E-04     | 9.99E+00          | 6.73E+05        | 1.62E-04     | 9.99E+00          |
| Ozone formation, Terrestrial ecosystems - use        | kg NOx eq    | 1.13E+04                     | 3.74E-05     | 3.36E+00          | 4.27E+04        | 3.74E-05     | 3.17E+00          | 1.56E+05        | 3.74E-05     | 2.31E+00          |
| Ozone formation, Human health - use                  | kg NOx eq    | 1.08E+04                     | 3.58E-05     | 3.22E+00          | 4.09E+04        | 3.58E-05     | 3.04E+00          | 1.49E+05        | 3.58E-05     | 2.21E+00          |
| Fine particulate matter formation - use              | kg PM2.5 eq  | 5.84E+03                     | 1.93E-05     | 1.73E+00          | 2.21E+04        | 1.93E-05     | 1.64E+00          | 8.04E+04        | 1.93E-05     | 1.19E+00          |
| Fossil resource scarcity - use                       | kg oil eq    | 1.92E+06                     | 6.35E-03     | 5.71E+02          | 7.26E+06        | 6.35E-03     | 5.39E+02          | 2.65E+07        | 6.35E-03     | 3.93E+02          |
| Land use - use                                       | m2a crop eq  | 5.61E+05                     | 1.85E-03     | 1.66E+02          | 2.12E+06        | 1.85E-03     | 1.57E+02          | 7.72E+06        | 1.85E-03     | 1.15E+02          |
| Human carcinogenic toxicity - use                    | kg 1,4-DCB   | 4.39E+05                     | 1.45E-03     | 1.30E+02          | 1.66E+06        | 1.45E-03     | 1.23E+02          | 6.05E+06        | 1.45E-03     | 8.98E+01          |
| Stratospheric ozone depletion - use                  | kg CFC11 eq  | 5.34E+00                     | 1.77E-08     | 1.59E-03          | 2.02E+01        | 1.77E-08     | 1.50E-03          | 7.36E+01        | 1.77E-08     | 1.09E-03          |
| Water consumption - use                              | m3           | 4.69E+04                     | 1.55E-04     | 1.39E+01          | 1.77E+05        | 1.55E-04     | 1.31E+01          | 6.46E+05        | 1.55E-04     | 9.59E+00          |
| Marine eutrophication - use                          | kg N eq      | 4.48E+02                     | 1.48E-06     | 1.33E-01          | 1.69E+03        | 1.48E-06     | 1.26E-01          | 6.17E+03        | 1.48E-06     | 9.16E-02          |

|                                               |              |          |          |          |          |          |          |          |          |          |
|-----------------------------------------------|--------------|----------|----------|----------|----------|----------|----------|----------|----------|----------|
| Freshwater eutrophication - use               | kg P eq      | 6.85E+03 | 2.26E-05 | 2.03E+00 | 2.59E+04 | 2.26E-05 | 1.92E+00 | 9.43E+04 | 2.26E-05 | 1.40E+00 |
| Freshwater ecotoxicity - use                  | kg 1,4-DCB   | 9.13E+05 | 3.02E-03 | 2.71E+02 | 3.45E+06 | 3.02E-03 | 2.56E+02 | 1.26E+07 | 3.02E-03 | 1.87E+02 |
| Human non-carcinogenic toxicity - use         | kg 1,4-DCB   | 1.72E+07 | 5.68E-02 | 5.10E+03 | 6.49E+07 | 5.68E-02 | 4.81E+03 | 2.37E+08 | 5.68E-02 | 3.51E+03 |
| Ionizing radiation - use                      | kBq Co-60 eq | 1.09E+06 | 3.60E-03 | 3.23E+02 | 4.11E+06 | 3.60E-03 | 3.05E+02 | 1.50E+07 | 3.60E-03 | 2.22E+02 |
| Marine ecotoxicity - use                      | kg 1,4-DCB   | 1.20E+06 | 3.96E-03 | 3.55E+02 | 4.52E+06 | 3.96E-03 | 3.35E+02 | 1.65E+07 | 3.96E-03 | 2.45E+02 |
| Global warming - use                          | kg CO2 eq    | 6.91E+06 | 2.28E-02 | 2.05E+03 | 2.61E+07 | 2.28E-02 | 1.94E+03 | 9.52E+07 | 2.28E-02 | 1.41E+03 |
| Terrestrial ecotoxicity - use                 | kg 1,4-DCB   | 1.69E+07 | 5.57E-02 | 5.00E+03 | 6.36E+07 | 5.57E-02 | 4.72E+03 | 2.32E+08 | 5.57E-02 | 3.44E+03 |
| Mineral resource scarcity - use               | kg Cu eq     | 3.83E+04 | 1.27E-04 | 1.14E+01 | 1.45E+05 | 1.27E-04 | 1.07E+01 | 5.28E+05 | 1.27E-04 | 7.84E+00 |
| Terrestrial acidification - use               | kg SO2 eq    | 1.60E+04 | 5.30E-05 | 4.76E+00 | 6.06E+04 | 5.30E-05 | 4.49E+00 | 2.21E+05 | 5.30E-05 | 3.28E+00 |
| Ozone formation, Terrestrial ecosystems - EoL | kg NOx eq    | 2.36E+02 | 7.79E-07 | 6.99E-02 | 9.42E+02 | 8.25E-07 | 6.99E-02 | 4.71E+03 | 1.13E-06 | 6.99E-02 |
| Ozone formation, Human health - EoL           | kg NOx eq    | 2.33E+02 | 7.70E-07 | 6.91E-02 | 9.32E+02 | 8.16E-07 | 6.91E-02 | 4.66E+03 | 1.12E-06 | 6.91E-02 |
| Fine particulate matter formation - EoL       | kg PM2.5 eq  | 2.57E+02 | 8.50E-07 | 7.63E-02 | 1.03E+03 | 9.00E-07 | 7.63E-02 | 5.14E+03 | 1.23E-06 | 7.63E-02 |
| Fossil resource scarcity - EoL                | kg oil eq    | 2.17E+04 | 7.16E-05 | 6.43E+00 | 8.66E+04 | 7.58E-05 | 6.43E+00 | 4.33E+05 | 1.04E-04 | 6.43E+00 |
| Land use - EoL                                | m2a crop eq  | 1.56E+03 | 5.14E-06 | 4.62E-01 | 6.22E+03 | 5.45E-06 | 4.62E-01 | 3.11E+04 | 7.47E-06 | 4.62E-01 |
| Human carcinogenic toxicity - EoL             | kg 1,4-DCB   | 7.15E+03 | 2.36E-05 | 2.12E+00 | 2.86E+04 | 2.50E-05 | 2.12E+00 | 1.43E+05 | 3.43E-05 | 2.12E+00 |
| Stratospheric ozone depletion - EoL           | kg CFC11 eq  | 6.62E-02 | 2.19E-10 | 1.96E-05 | 2.65E-01 | 2.32E-10 | 1.96E-05 | 1.32E+00 | 3.18E-10 | 1.96E-05 |
| Water consumption - EoL                       | m3           | 1.33E+03 | 4.39E-06 | 3.94E-01 | 5.31E+03 | 4.65E-06 | 3.94E-01 | 2.65E+04 | 6.37E-06 | 3.94E-01 |
| Marine eutrophication - EoL                   | kg N eq      | 8.46E+00 | 2.80E-08 | 2.51E-03 | 3.38E+01 | 2.96E-08 | 2.51E-03 | 1.69E+02 | 4.06E-08 | 2.51E-03 |
| Freshwater eutrophication - EoL               | kg P eq      | 4.18E+01 | 1.38E-07 | 1.24E-02 | 1.67E+02 | 1.46E-07 | 1.24E-02 | 8.36E+02 | 2.01E-07 | 1.24E-02 |
| Freshwater ecotoxicity - EoL                  | kg 1,4-DCB   | 7.33E+03 | 2.42E-05 | 2.18E+00 | 2.93E+04 | 2.57E-05 | 2.18E+00 | 1.47E+05 | 3.52E-05 | 2.18E+00 |
| Human non-carcinogenic toxicity - EoL         | kg 1,4-DCB   | 1.26E+05 | 4.15E-04 | 3.73E+01 | 5.02E+05 | 4.40E-04 | 3.73E+01 | 2.51E+06 | 6.03E-04 | 3.73E+01 |
| Ionizing radiation - EoL                      | kBq Co-60 eq | 9.07E+03 | 3.00E-05 | 2.69E+00 | 3.63E+04 | 3.18E-05 | 2.69E+00 | 1.81E+05 | 4.35E-05 | 2.69E+00 |
| Marine ecotoxicity - EoL                      | kg 1,4-DCB   | 9.64E+03 | 3.19E-05 | 2.86E+00 | 3.86E+04 | 3.37E-05 | 2.86E+00 | 1.93E+05 | 4.63E-05 | 2.86E+00 |
| Global warming - EoL                          | kg CO2 eq    | 9.86E+04 | 3.26E-04 | 2.93E+01 | 3.94E+05 | 3.45E-04 | 2.93E+01 | 1.97E+06 | 4.73E-04 | 2.93E+01 |
| Terrestrial ecotoxicity - EoL                 | kg 1,4-DCB   | 3.66E+05 | 1.21E-03 | 1.09E+02 | 1.46E+06 | 1.28E-03 | 1.09E+02 | 7.32E+06 | 1.76E-03 | 1.09E+02 |
| Mineral resource scarcity - EoL               | kg Cu eq     | 7.27E+02 | 2.40E-06 | 2.16E-01 | 2.91E+03 | 2.55E-06 | 2.16E-01 | 1.45E+04 | 3.49E-06 | 2.16E-01 |
| Terrestrial acidification - EoL               | kg SO2 eq    | 4.89E+02 | 1.62E-06 | 1.45E-01 | 1.96E+03 | 1.71E-06 | 1.45E-01 | 9.79E+03 | 2.35E-06 | 1.45E-01 |

**Table S2** LCIA for e-moped fleets with renewable electricity mix

| Impact category                                      | Unit         | Active fleet: 2,500 vehicles |              |                   | 10,000 vehicles |              |                   | 50,000 vehicles |              |                   |
|------------------------------------------------------|--------------|------------------------------|--------------|-------------------|-----------------|--------------|-------------------|-----------------|--------------|-------------------|
|                                                      |              | Value                        | Value per km | Value per vehicle | Value           | Value per km | Value per vehicle | Value           | Value per km | Value per vehicle |
| Ozone formation, Terrestrial ecosystems - production | kg NOx eq    | 1.03E+04                     | 3.39E-05     | 3.05E+00          | 4.11E+04        | 3.59E-05     | 3.05E+00          | 2.05E+05        | 4.93E-05     | 3.05E+00          |
| Ozone formation, Human health - production           | kg NOx eq    | 9.75E+03                     | 3.22E-05     | 2.89E+00          | 3.90E+04        | 3.41E-05     | 2.89E+00          | 1.95E+05        | 4.68E-05     | 2.89E+00          |
| Fine particulate matter formation - production       | kg PM2.5 eq  | 1.27E+04                     | 4.20E-05     | 3.77E+00          | 5.08E+04        | 4.45E-05     | 3.77E+00          | 2.54E+05        | 6.10E-05     | 3.77E+00          |
| Fossil resource scarcity - production                | kg oil eq    | 7.85E+05                     | 2.59E-03     | 2.33E+02          | 3.14E+06        | 2.75E-03     | 2.33E+02          | 1.57E+07        | 3.77E-03     | 2.33E+02          |
| Land use - production                                | m2a crop eq  | 6.10E+04                     | 2.02E-04     | 1.81E+01          | 2.44E+05        | 2.14E-04     | 1.81E+01          | 1.22E+06        | 2.93E-04     | 1.81E+01          |
| Human carcinogenic toxicity - production             | kg 1,4-DCB   | 5.32E+05                     | 1.76E-03     | 1.58E+02          | 2.13E+06        | 1.86E-03     | 1.58E+02          | 1.06E+07        | 2.55E-03     | 1.58E+02          |
| Stratospheric ozone depletion - production           | kg CFC11 eq  | 1.50E+00                     | 4.96E-09     | 4.46E-04          | 6.01E+00        | 5.26E-09     | 4.46E-04          | 3.00E+01        | 7.21E-09     | 4.46E-04          |
| Water consumption - production                       | m3           | 3.15E+04                     | 1.04E-04     | 9.35E+00          | 1.26E+05        | 1.10E-04     | 9.35E+00          | 6.30E+05        | 1.51E-04     | 9.35E+00          |
| Marine eutrophication - production                   | kg N eq      | 1.34E+02                     | 4.42E-07     | 3.97E-02          | 5.35E+02        | 4.68E-07     | 3.97E-02          | 2.67E+03        | 6.42E-07     | 3.97E-02          |
| Freshwater eutrophication - production               | kg P eq      | 3.09E+03                     | 1.02E-05     | 9.18E-01          | 1.24E+04        | 1.08E-05     | 9.18E-01          | 6.19E+04        | 1.49E-05     | 9.18E-01          |
| Freshwater ecotoxicity - production                  | kg 1,4-DCB   | 1.94E+06                     | 6.40E-03     | 5.75E+02          | 7.74E+06        | 6.78E-03     | 5.75E+02          | 3.87E+07        | 9.30E-03     | 5.75E+02          |
| Human non-carcinogenic toxicity - production         | kg 1,4-DCB   | 2.00E+07                     | 6.62E-02     | 5.94E+03          | 8.01E+07        | 7.01E-02     | 5.94E+03          | 4.00E+08        | 9.61E-02     | 5.94E+03          |
| Ionizing radiation - production                      | kBq Co-60 eq | 1.54E+05                     | 5.09E-04     | 4.57E+01          | 6.16E+05        | 5.39E-04     | 4.57E+01          | 3.08E+06        | 7.39E-04     | 4.57E+01          |
| Marine ecotoxicity - production                      | kg 1,4-DCB   | 2.47E+06                     | 8.16E-03     | 7.33E+02          | 9.88E+06        | 8.65E-03     | 7.33E+02          | 4.94E+07        | 1.19E-02     | 7.33E+02          |
| Global warming - production                          | kg CO2 eq    | 2.79E+06                     | 9.22E-03     | 8.28E+02          | 1.12E+07        | 9.77E-03     | 8.28E+02          | 5.58E+07        | 1.34E-02     | 8.28E+02          |
| Terrestrial ecotoxicity - production                 | kg 1,4-DCB   | 8.29E+07                     | 2.74E-01     | 2.46E+04          | 3.31E+08        | 2.90E-01     | 2.46E+04          | 1.66E+09        | 3.98E-01     | 2.46E+04          |
| Mineral resource scarcity - production               | kg Cu eq     | 2.01E+05                     | 6.64E-04     | 5.96E+01          | 8.04E+05        | 7.04E-04     | 5.96E+01          | 4.02E+06        | 9.65E-04     | 5.96E+01          |
| Terrestrial acidification - production               | kg SO2 eq    | 3.37E+04                     | 1.11E-04     | 9.99E+00          | 1.35E+05        | 1.18E-04     | 9.99E+00          | 6.73E+05        | 1.62E-04     | 9.99E+00          |
| Ozone formation, Terrestrial ecosystems - use        | kg NOx eq    | 7.40E+03                     | 2.45E-05     | 2.20E+00          | 2.80E+04        | 2.45E-05     | 2.07E+00          | 1.02E+05        | 2.45E-05     | 1.51E+00          |
| Ozone formation, Human health - use                  | kg NOx eq    | 6.96E+03                     | 2.30E-05     | 2.06E+00          | 2.63E+04        | 2.30E-05     | 1.95E+00          | 9.58E+04        | 2.30E-05     | 1.42E+00          |
| Fine particulate matter formation - use              | kg PM2.5 eq  | 4.49E+03                     | 1.48E-05     | 1.33E+00          | 1.69E+04        | 1.48E-05     | 1.26E+00          | 6.18E+04        | 1.48E-05     | 9.17E-01          |
| Fossil resource scarcity - use                       | kg oil eq    | 8.63E+05                     | 2.85E-03     | 2.56E+02          | 3.26E+06        | 2.85E-03     | 2.42E+02          | 1.19E+07        | 2.85E-03     | 1.76E+02          |
| Land use - use                                       | m2a crop eq  | 2.76E+05                     | 9.11E-04     | 8.18E+01          | 1.04E+06        | 9.11E-04     | 7.72E+01          | 3.79E+06        | 9.11E-04     | 5.63E+01          |
| Human carcinogenic toxicity - use                    | kg 1,4-DCB   | 1.99E+05                     | 6.56E-04     | 5.89E+01          | 7.50E+05        | 6.56E-04     | 5.56E+01          | 2.73E+06        | 6.56E-04     | 4.06E+01          |
| Stratospheric ozone depletion - use                  | kg CFC11 eq  | 1.95E+00                     | 6.45E-09     | 5.79E-04          | 7.37E+00        | 6.45E-09     | 5.47E-04          | 2.69E+01        | 6.45E-09     | 3.99E-04          |
| Water consumption - use                              | m3           | 3.22E+04                     | 1.07E-04     | 9.56E+00          | 1.22E+05        | 1.07E-04     | 9.03E+00          | 4.44E+05        | 1.07E-04     | 6.58E+00          |
| Marine eutrophication - use                          | kg N eq      | 8.09E+01                     | 2.67E-07     | 2.40E-02          | 3.05E+02        | 2.67E-07     | 2.27E-02          | 1.11E+03        | 2.67E-07     | 1.65E-02          |
| Freshwater eutrophication - use                      | kg P eq      | 9.97E+02                     | 3.29E-06     | 2.96E-01          | 3.76E+03        | 3.29E-06     | 2.79E-01          | 1.37E+04        | 3.29E-06     | 2.04E-01          |
| Freshwater ecotoxicity - use                         | kg 1,4-DCB   | 9.29E+05                     | 3.07E-03     | 2.76E+02          | 3.51E+06        | 3.07E-03     | 2.60E+02          | 1.28E+07        | 3.07E-03     | 1.90E+02          |
| Human non-carcinogenic toxicity - use                | kg 1,4-DCB   | 1.40E+07                     | 4.64E-02     | 4.16E+03          | 5.30E+07        | 4.64E-02     | 3.93E+03          | 1.93E+08        | 4.64E-02     | 2.87E+03          |

|                                               |              |          |          |          |          |          |          |          |          |          |
|-----------------------------------------------|--------------|----------|----------|----------|----------|----------|----------|----------|----------|----------|
| Ionizing radiation - use                      | kBq Co-60 eq | 1.38E+05 | 4.57E-04 | 4.11E+01 | 5.22E+05 | 4.57E-04 | 3.88E+01 | 1.90E+06 | 4.57E-04 | 2.83E+01 |
| Marine ecotoxicity - use                      | kg 1,4-DCB   | 1.20E+06 | 3.97E-03 | 3.56E+02 | 4.53E+06 | 3.97E-03 | 3.36E+02 | 1.65E+07 | 3.97E-03 | 2.45E+02 |
| Global warming - use                          | kg CO2 eq    | 2.79E+06 | 9.21E-03 | 8.27E+02 | 1.05E+07 | 9.21E-03 | 7.81E+02 | 3.84E+07 | 9.21E-03 | 5.69E+02 |
| Terrestrial ecotoxicity - use                 | kg 1,4-DCB   | 2.54E+07 | 8.39E-02 | 7.53E+03 | 9.58E+07 | 8.39E-02 | 7.11E+03 | 3.49E+08 | 8.39E-02 | 5.19E+03 |
| Mineral resource scarcity - use               | kg Cu eq     | 4.43E+04 | 1.46E-04 | 1.32E+01 | 1.67E+05 | 1.46E-04 | 1.24E+01 | 6.10E+05 | 1.46E-04 | 9.06E+00 |
| Terrestrial acidification - use               | kg SO2 eq    | 1.02E+04 | 3.38E-05 | 3.03E+00 | 3.86E+04 | 3.38E-05 | 2.86E+00 | 1.41E+05 | 3.38E-05 | 2.09E+00 |
| Ozone formation, Terrestrial ecosystems - EoL | kg NOx eq    | 2.36E+02 | 7.79E-07 | 6.99E-02 | 9.42E+02 | 8.25E-07 | 6.99E-02 | 4.71E+03 | 1.13E-06 | 6.99E-02 |
| Ozone formation, Human health - EoL           | kg NOx eq    | 2.33E+02 | 7.70E-07 | 6.91E-02 | 9.32E+02 | 8.16E-07 | 6.91E-02 | 4.66E+03 | 1.12E-06 | 6.91E-02 |
| Fine particulate matter formation - EoL       | kg PM2.5 eq  | 2.57E+02 | 8.50E-07 | 7.63E-02 | 1.03E+03 | 9.00E-07 | 7.63E-02 | 5.14E+03 | 1.23E-06 | 7.63E-02 |
| Fossil resource scarcity - EoL                | kg oil eq    | 2.17E+04 | 7.16E-05 | 6.43E+00 | 8.66E+04 | 7.58E-05 | 6.43E+00 | 4.33E+05 | 1.04E-04 | 6.43E+00 |
| Land use - EoL                                | m2a crop eq  | 1.56E+03 | 5.14E-06 | 4.62E-01 | 6.22E+03 | 5.45E-06 | 4.62E-01 | 3.11E+04 | 7.47E-06 | 4.62E-01 |
| Human carcinogenic toxicity - EoL             | kg 1,4-DCB   | 7.15E+03 | 2.36E-05 | 2.12E+00 | 2.86E+04 | 2.50E-05 | 2.12E+00 | 1.43E+05 | 3.43E-05 | 2.12E+00 |
| Stratospheric ozone depletion - EoL           | kg CFC11 eq  | 6.62E-02 | 2.19E-10 | 1.96E-05 | 2.65E-01 | 2.32E-10 | 1.96E-05 | 1.32E+00 | 3.18E-10 | 1.96E-05 |
| Water consumption - EoL                       | m3           | 1.33E+03 | 4.39E-06 | 3.94E-01 | 5.31E+03 | 4.65E-06 | 3.94E-01 | 2.65E+04 | 6.37E-06 | 3.94E-01 |
| Marine eutrophication - EoL                   | kg N eq      | 8.46E+00 | 2.80E-08 | 2.51E-03 | 3.38E+01 | 2.96E-08 | 2.51E-03 | 1.69E+02 | 4.06E-08 | 2.51E-03 |
| Freshwater eutrophication - EoL               | kg P eq      | 4.18E+01 | 1.38E-07 | 1.24E-02 | 1.67E+02 | 1.46E-07 | 1.24E-02 | 8.36E+02 | 2.01E-07 | 1.24E-02 |
| Freshwater ecotoxicity - EoL                  | kg 1,4-DCB   | 7.33E+03 | 2.42E-05 | 2.18E+00 | 2.93E+04 | 2.57E-05 | 2.18E+00 | 1.47E+05 | 3.52E-05 | 2.18E+00 |
| Human non-carcinogenic toxicity - EoL         | kg 1,4-DCB   | 1.26E+05 | 4.15E-04 | 3.73E+01 | 5.02E+05 | 4.40E-04 | 3.73E+01 | 2.51E+06 | 6.03E-04 | 3.73E+01 |
| Ionizing radiation - EoL                      | kBq Co-60 eq | 9.07E+03 | 3.00E-05 | 2.69E+00 | 3.63E+04 | 3.18E-05 | 2.69E+00 | 1.81E+05 | 4.35E-05 | 2.69E+00 |
| Marine ecotoxicity - EoL                      | kg 1,4-DCB   | 9.64E+03 | 3.19E-05 | 2.86E+00 | 3.86E+04 | 3.37E-05 | 2.86E+00 | 1.93E+05 | 4.63E-05 | 2.86E+00 |
| Global warming - EoL                          | kg CO2 eq    | 9.86E+04 | 3.26E-04 | 2.93E+01 | 3.94E+05 | 3.45E-04 | 2.93E+01 | 1.97E+06 | 4.73E-04 | 2.93E+01 |
| Terrestrial ecotoxicity - EoL                 | kg 1,4-DCB   | 3.66E+05 | 1.21E-03 | 1.09E+02 | 1.46E+06 | 1.28E-03 | 1.09E+02 | 7.32E+06 | 1.76E-03 | 1.09E+02 |
| Mineral resource scarcity - EoL               | kg Cu eq     | 7.27E+02 | 2.40E-06 | 2.16E-01 | 2.91E+03 | 2.55E-06 | 2.16E-01 | 1.45E+04 | 3.49E-06 | 2.16E-01 |
| Terrestrial acidification - EoL               | kg SO2 eq    | 4.89E+02 | 1.62E-06 | 1.45E-01 | 1.96E+03 | 1.71E-06 | 1.45E-01 | 9.79E+03 | 2.35E-06 | 1.45E-01 |

**Table S3** CED for e-moped fleets with German electricity mix of 2019

| CED component                              | Unit | Active fleet: 2,500 vehicles |              |                   | 10,000 vehicles |              |                   | 50,000 vehicles |              |                   |
|--------------------------------------------|------|------------------------------|--------------|-------------------|-----------------|--------------|-------------------|-----------------|--------------|-------------------|
|                                            |      | Value                        | Value per km | Value per vehicle | Value           | Value per km | Value per vehicle | Value           | Value per km | Value per vehicle |
| Renewable, wind, solar, geoth - production | MJ   | 3.01E+05                     | 9.94E-04     | 8.93E+01          | 1.20E+06        | 1.05E-03     | 8.93E+01          | 6.01E+06        | 1.44E-03     | 8.93E+01          |
| Renewable, water – production              | MJ   | 2.47E+06                     | 8.17E-03     | 7.33E+02          | 9.88E+06        | 8.65E-03     | 7.33E+02          | 4.94E+07        | 1.19E-02     | 7.33E+02          |
| Renewable, biomass - production            | MJ   | 7.82E+05                     | 2.58E-03     | 2.32E+02          | 3.13E+06        | 2.74E-03     | 2.32E+02          | 1.56E+07        | 3.75E-03     | 2.32E+02          |
| Non-renewable, nuclear - production        | MJ   | 3.00E+06                     | 9.92E-03     | 8.90E+02          | 1.20E+07        | 1.05E-02     | 8.90E+02          | 6.00E+07        | 1.44E-02     | 8.90E+02          |
| Non-renewable, biomass - production        | MJ   | 4.24E+03                     | 1.40E-05     | 1.26E+00          | 1.69E+04        | 1.48E-05     | 1.26E+00          | 8.47E+04        | 2.03E-05     | 1.26E+00          |
| Non-renewable, fossil - production         | MJ   | 3.34E+07                     | 1.10E-01     | 9.90E+03          | 1.33E+08        | 1.17E-01     | 9.90E+03          | 6.67E+08        | 1.60E-01     | 9.90E+03          |
| Renewable, wind, solar, geoth - use        | MJ   | 1.16E+07                     | 3.83E-02     | 3.44E+03          | 4.37E+07        | 3.83E-02     | 3.24E+03          | 1.59E+08        | 3.83E-02     | 2.36E+03          |
| Renewable, water - use                     | MJ   | 2.60E+06                     | 8.59E-03     | 7.72E+02          | 9.81E+06        | 8.59E-03     | 7.28E+02          | 3.58E+07        | 8.59E-03     | 5.31E+02          |
| Renewable, biomass - use                   | MJ   | 8.17E+06                     | 2.70E-02     | 2.43E+03          | 3.09E+07        | 2.70E-02     | 2.29E+03          | 1.13E+08        | 2.70E-02     | 1.67E+03          |
| Non-renewable, nuclear - use               | MJ   | 2.07E+07                     | 6.84E-02     | 6.14E+03          | 7.81E+07        | 6.84E-02     | 5.79E+03          | 2.85E+08        | 6.84E-02     | 4.23E+03          |
| Non-renewable, biomass - use               | MJ   | 9.15E+02                     | 3.03E-06     | 2.72E-01          | 3.46E+03        | 3.03E-06     | 2.56E-01          | 1.26E+04        | 3.03E-06     | 1.87E-01          |
| Non-renewable, fossil - use                | MJ   | 8.02E+07                     | 2.65E-01     | 2.38E+04          | 3.03E+08        | 2.65E-01     | 2.25E+04          | 1.10E+09        | 2.65E-01     | 1.64E+04          |
| Renewable, wind, solar, geoth - EoL        | MJ   | 1.93E+04                     | 6.39E-05     | 5.74E+00          | 7.74E+04        | 6.77E-05     | 5.74E+00          | 3.87E+05        | 9.29E-05     | 5.74E+00          |
| Renewable, water - EoL                     | MJ   | 1.91E+05                     | 6.30E-04     | 5.66E+01          | 7.63E+05        | 6.68E-04     | 5.66E+01          | 3.81E+06        | 9.16E-04     | 5.66E+01          |
| Renewable, biomass - EoL                   | MJ   | 2.48E+04                     | 8.21E-05     | 7.37E+00          | 9.93E+04        | 8.70E-05     | 7.37E+00          | 4.97E+05        | 1.19E-04     | 7.37E+00          |
| Non-renewable, nuclear - EoL               | MJ   | 1.67E+05                     | 5.53E-04     | 4.96E+01          | 6.69E+05        | 5.85E-04     | 4.96E+01          | 3.34E+06        | 8.03E-04     | 4.96E+01          |
| Non-renewable, biomass - EoL               | MJ   | 3.07E+01                     | 1.01E-07     | 9.11E-03          | 1.23E+02        | 1.07E-07     | 9.11E-03          | 6.14E+02        | 1.47E-07     | 9.11E-03          |
| Non-renewable, fossil - EoL                | MJ   | 9.17E+05                     | 3.03E-03     | 2.72E+02          | 3.67E+06        | 3.21E-03     | 2.72E+02          | 1.83E+07        | 4.40E-03     | 2.72E+02          |

**Table S4** CED for e-moped fleets with renewable electricity mix

| CED component                              | Unit | Active fleet: 2,500 vehicles |              |                   | 10,000 vehicles |              |                   | 50,000 vehicles |              |                   |
|--------------------------------------------|------|------------------------------|--------------|-------------------|-----------------|--------------|-------------------|-----------------|--------------|-------------------|
|                                            |      | Value                        | Value per km | Value per vehicle | Value           | Value per km | Value per vehicle | Value           | Value per km | Value per vehicle |
| Renewable, wind, solar, geoth - production | MJ   | 3.01E+05                     | 9.94E-04     | 8.93E+01          | 1.20E+06        | 1.05E-03     | 8.93E+01          | 6.01E+06        | 1.44E-03     | 8.93E+01          |
| Renewable, water – production              | MJ   | 2.47E+06                     | 8.17E-03     | 7.33E+02          | 9.88E+06        | 8.65E-03     | 7.33E+02          | 4.94E+07        | 1.19E-02     | 7.33E+02          |
| Renewable, biomass - production            | MJ   | 7.82E+05                     | 2.58E-03     | 2.32E+02          | 3.13E+06        | 2.74E-03     | 2.32E+02          | 1.56E+07        | 3.75E-03     | 2.32E+02          |
| Non-renewable, nuclear - production        | MJ   | 3.00E+06                     | 9.92E-03     | 8.90E+02          | 1.20E+07        | 1.05E-02     | 8.90E+02          | 6.00E+07        | 1.44E-02     | 8.90E+02          |
| Non-renewable, biomass - production        | MJ   | 4.24E+03                     | 1.40E-05     | 1.26E+00          | 1.69E+04        | 1.48E-05     | 1.26E+00          | 8.47E+04        | 2.03E-05     | 1.26E+00          |
| Non-renewable, fossil - production         | MJ   | 3.34E+07                     | 1.10E-01     | 9.90E+03          | 1.33E+08        | 1.17E-01     | 9.90E+03          | 6.67E+08        | 1.60E-01     | 9.90E+03          |
| Renewable, wind, solar, geoth - use        | MJ   | 4.09E+07                     | 1.35E-01     | 1.21E+04          | 1.54E+08        | 1.35E-01     | 1.15E+04          | 5.63E+08        | 1.35E-01     | 8.35E+03          |
| Renewable, water - use                     | MJ   | 2.47E+06                     | 8.18E-03     | 7.34E+02          | 9.34E+06        | 8.18E-03     | 6.93E+02          | 3.41E+07        | 8.18E-03     | 5.05E+02          |
| Renewable, biomass - use                   | MJ   | 7.00E+05                     | 2.31E-03     | 2.08E+02          | 2.64E+06        | 2.31E-03     | 1.96E+02          | 9.64E+06        | 2.31E-03     | 1.43E+02          |
| Non-renewable, nuclear - use               | MJ   | 2.61E+06                     | 8.62E-03     | 7.74E+02          | 9.84E+06        | 8.62E-03     | 7.30E+02          | 3.59E+07        | 8.62E-03     | 5.33E+02          |
| Non-renewable, biomass - use               | MJ   | 5.44E+02                     | 1.80E-06     | 1.62E-01          | 2.05E+03        | 1.80E-06     | 1.52E-01          | 7.49E+03        | 1.80E-06     | 1.11E-01          |
| Non-renewable, fossil - use                | MJ   | 3.68E+07                     | 1.22E-01     | 1.09E+04          | 1.39E+08        | 1.22E-01     | 1.03E+04          | 5.07E+08        | 1.22E-01     | 7.53E+03          |
| Renewable, wind, solar, geoth - EoL        | MJ   | 1.93E+04                     | 6.39E-05     | 5.74E+00          | 7.74E+04        | 6.77E-05     | 5.74E+00          | 3.87E+05        | 9.29E-05     | 5.74E+00          |
| Renewable, water - EoL                     | MJ   | 1.91E+05                     | 6.30E-04     | 5.66E+01          | 7.63E+05        | 6.68E-04     | 5.66E+01          | 3.81E+06        | 9.16E-04     | 5.66E+01          |
| Renewable, biomass - EoL                   | MJ   | 2.48E+04                     | 8.21E-05     | 7.37E+00          | 9.93E+04        | 8.70E-05     | 7.37E+00          | 4.97E+05        | 1.19E-04     | 7.37E+00          |
| Non-renewable, nuclear - EoL               | MJ   | 1.67E+05                     | 5.53E-04     | 4.96E+01          | 6.69E+05        | 5.85E-04     | 4.96E+01          | 3.34E+06        | 8.03E-04     | 4.96E+01          |
| Non-renewable, biomass - EoL               | MJ   | 3.07E+01                     | 1.01E-07     | 9.11E-03          | 1.23E+02        | 1.07E-07     | 9.11E-03          | 6.14E+02        | 1.47E-07     | 9.11E-03          |
| Non-renewable, fossil - EoL                | MJ   | 9.17E+05                     | 3.03E-03     | 2.72E+02          | 3.67E+06        | 3.21E-03     | 2.72E+02          | 1.83E+07        | 4.40E-03     | 2.72E+02          |

**Table S5** Personnel cost structure for e-moped fleets for main scenarios

| Personnel category           | Annual labor burden for employer | Active fleet: 2,500 vehicles |             | 10,000 vehicles     |             | 50,000 vehicles     |              |
|------------------------------|----------------------------------|------------------------------|-------------|---------------------|-------------|---------------------|--------------|
|                              |                                  | Number of employees          | Total costs | Number of employees | Total costs | Number of employees | Total costs  |
| Management                   | 119,444 €                        | 2                            | 238,889 €   | 2                   | 238,889 €   | 2                   | 238,889 €    |
| Business Development Manager | 74,653 €                         | 1                            | 74,653 €    | 1                   | 74,653 €    | 1                   | 74,653 €     |
| Operations Manager           | 73,578 €                         | 2                            | 147,156 €   | 3                   | 220,733 €   | 6                   | 441,467 €    |
| Data Specialist              | 74,294 €                         | 2                            | 148,589 €   | 2                   | 148,589 €   | 2                   | 148,589 €    |
| Software Engineer            | 83,611 €                         | 4                            | 334,444 €   | 4                   | 334,444 €   | 4                   | 334,444 €    |
| Marketing Manager            | 67,486 €                         | 1                            | 67,486 €    | 1                   | 67,486 €    | 1                   | 67,486 €     |
| Legal Counsel                | 103,319 €                        | 1                            | 103,319 €   | 1                   | 103,319 €   | 1                   | 103,319 €    |
| Customer Service Agent       | 33,444 €                         | 2                            | 66,889 €    | 5                   | 167,222 €   | 25                  | 836,111 €    |
| Warehouse Manager            | 48,972 €                         | 2                            | 97,944 €    | 3                   | 146,917 €   | 6                   | 293,833 €    |
| Mechanic                     | 44,792 €                         | 2                            | 89,583 €    | 9                   | 403,125 €   | 44                  | 1,970,833 €  |
| Cleaner                      | 29,861 €                         | 1                            | 29,861 €    | 3                   | 89,583 €    | 8                   | 238,889 €    |
| Battery swapper              | 29,861 €                         | 62                           | 1,851,389 € | 202                 | 6,031,944 € | 717                 | 21,410,417 € |
| Total                        |                                  | 82                           | 3,250,203 € | 236                 | 8,026,906 € | 817                 | 26,158,931 € |

**Table S6** Personnel cost structure for e-moped fleets for additional scenarios (PF - personal factor, BS - 8h battery swap)

| Personnel category           | Annual labor burden for employer | Active fleet: 500 vehicles |             | 2,500 vehicles (PF) |             | 2,500 vehicles (BS) |             |
|------------------------------|----------------------------------|----------------------------|-------------|---------------------|-------------|---------------------|-------------|
|                              |                                  | Number of employees        | Total costs | Number of employees | Total costs | Number of employees | Total costs |
| Management                   | 119,444 €                        | 2                          | 238,889 €   | 2                   | 238,889 €   | 2                   | 238,889 €   |
| Business Development Manager | 74,653 €                         | 1                          | 74,653 €    | 1                   | 74,653 €    | 1                   | 74,653 €    |
| Operations Manager           | 73,578 €                         | 1                          | 73,578 €    | 2                   | 147,156 €   | 2                   | 147,156 €   |
| Data Specialist              | 74,294 €                         | 2                          | 148,589 €   | 2                   | 148,589 €   | 2                   | 148,589 €   |
| Software Engineer            | 83,611 €                         | 4                          | 334,444 €   | 4                   | 334,444 €   | 4                   | 334,444 €   |
| Marketing Manager            | 67,486 €                         | 1                          | 67,486 €    | 1                   | 67,486 €    | 1                   | 67,486 €    |
| Legal Counsel                | 103,319 €                        | 1                          | 103,319 €   | 1                   | 103,319 €   | 1                   | 103,319 €   |
| Customer Service Agent       | 33,444 €                         | 1                          | 33,444 €    | 2                   | 66,889 €    | 2                   | 66,889 €    |
| Warehouse Manager            | 48,972 €                         | 1                          | 48,972 €    | 2                   | 97,944 €    | 2                   | 97,944 €    |
| Mechanic                     | 44,792 €                         | 1                          | 44,792 €    | 2                   | 89,583 €    | 2                   | 89,583 €    |
| Cleaner                      | 29,861 €                         | 1                          | 29,861 €    | 1                   | 29,861 €    | 1                   | 29,861 €    |
| Battery swapper              | 29,861 €                         | 11                         | 328,472 €   | 34                  | 1,015,278 € | 45                  | 1,343,750 € |
| Total                        |                                  | 27                         | 1,526,500 € | 54                  | 2,414,092 € | 65                  | 2,742,564 € |

**Table S7** Cross-scenario operation parameters for e-moped fleets

| Parameter                                | Unit | Electric cargo bike | Electric panel van |
|------------------------------------------|------|---------------------|--------------------|
| Share of working hours of paid hours     |      | 90%                 |                    |
| Health check duration per vehicle        | min  | 6                   |                    |
| Weekly working hours per battery swapper | h    | 40                  |                    |
| Battery capacity                         | kWh  | 0.4                 | 40                 |
| Range                                    | km   | 60                  | 250                |
| Maximum load                             | kg   | 130                 | 550                |
| Number of batteries per tour             |      | 14                  | 59                 |
| Number of tours per shift                |      | 12                  | 4                  |
| Batterys swapped per shift               |      | 166                 | 234                |

**Table S8** Scenario-specific operation parameters for e-moped fleets for main scenarios

|                                                      | <i>Active fleet: 2,500 vehicles</i> |                    | <i>10,000 vehicles</i> |                    | <i>50,000 vehicles</i> |                    |
|------------------------------------------------------|-------------------------------------|--------------------|------------------------|--------------------|------------------------|--------------------|
| Parameter                                            | Electric cargo bike                 | Electric panel van | Electric cargo bike    | Electric panel van | Electric cargo bike    | Electric panel van |
| Daily batteries swapped                              | 4,206                               |                    | 15,860                 |                    | 57,638                 |                    |
| Batteries swapped per average shift                  | 1,402                               |                    | 5,287                  |                    | 19,213                 |                    |
| Daily Batteries swapped by vehicle per average shift | 421                                 | 981                | 1,586                  | 3,701              | 5,764                  | 13,449             |
| Distance driven per average shift                    | 86                                  | 82                 | 79                     | 71                 | 75                     | 65                 |
| Total number of vehicles in fleet                    | 18                                  | 15                 | 60                     | 48                 | 210                    | 174                |
| Total shift hours per week                           | 2,464                               |                    | 8,064                  |                    | 28,672                 |                    |
| Number of battery swapper needed                     | 62                                  |                    | 202                    |                    | 717                    |                    |



**Table S9** Scenario-specific operation parameters for e-moped fleets for additional scenarios (PF - personal factor, BS - 8h battery swap)

|                                                      | <i>Active fleet: 500 vehicles</i> |                           | <i>2,500 vehicles (PF)</i> |                           | <i>2,500 vehicles (BS)</i> |                           |
|------------------------------------------------------|-----------------------------------|---------------------------|----------------------------|---------------------------|----------------------------|---------------------------|
| <b>Parameter</b>                                     | <b>Electric cargo bike</b>        | <b>Electric panel van</b> | <b>Electric cargo bike</b> | <b>Electric panel van</b> | <b>Electric cargo bike</b> | <b>Electric panel van</b> |
| Daily batteries swapped                              | 808                               |                           | 2,165                      |                           | 3,312                      |                           |
| Batteries swapped per average shift                  | 269                               |                           | 722                        |                           | 1,104                      |                           |
| Daily Batteries swapped by vehicle per average shift | 81                                | 189                       | 217                        | 505                       | 331                        | 773                       |
| Distance driven per average shift                    | 102                               | 109                       | 86                         | 82                        | 86                         | 82                        |
| Total number of vehicles in fleet                    | 3                                 | 3                         | 9                          | 9                         | 12                         | 12                        |
| Total shift hours per week                           | 448                               |                           | 1,344                      |                           | 1,792                      |                           |
| Number of battery swapper needed                     | 11                                |                           | 34                         |                           | 45                         |                           |
